# Supplementary material for: A bimetallic 3D interconnected metal–organic framework with 2D morphology and its derived electrocatalyst for oxygen reduction
Source: Royal Society of Chemistry journal article supplement (doi:10.1039/d3ce00097d), 2023-01-01
Supplement: d3ce00097d1.pdf [file d3ce00097d1.pdf]

Electronic Supplementary Information (ESI) for CrystEngComm

**A Bimetallic 3D Interconnected Metal-Organic Framework with 2D Morphology  
and Its Derived Electrocatalyst for Oxygen Reduction**

Zijia Bao,<sup>†, a</sup> Guojun Zhou,<sup>†, b</sup> Xinrong Liu,<sup>a</sup> Yuxin Peng,<sup>a</sup> Zhehao Huang,<sup>\*b</sup> Haoquan Zheng<sup>\*a, c</sup>

<sup>a</sup>Key Laboratory of Applied Surface and Colloid Chemistry, Ministry of Education, School of Chemistry and Chemical Engineering, Shaanxi Normal University, Xi'an 710119, China

<sup>b</sup>Department of Materials and Environmental Chemistry, Stockholm University, Stockholm, SE-10691, Sweden

<sup>c</sup>International Joint Research Center on Advanced Characterizations of Xi'an City, School of Chemistry and Chemical Engineering, Shaanxi Normal University, Xi'an, 710119, China

Correspondence Email: [zhenghaoquan@snnu.edu.cn](mailto:zhenghaoquan@snnu.edu.cn); [zhehao.huang@mmk.su.se](mailto:zhehao.huang@mmk.su.se)

## **1. Experimental section**

### **1.1 Materials**

Co(NO)<sub>3</sub>·6H<sub>2</sub>O (AR, 99%), Zn(NO)<sub>3</sub>·6H<sub>2</sub>O (AR, 99%), 2-methylimidazole (AR, 99%), KOH (AR, 95%), Zn(CH<sub>3</sub>COO)<sub>2</sub>·2H<sub>2</sub>O (AR, 99%) and were purchased from the Energy Chemical. NaOH (AR, 96%), isopropanol (AR, 99.7%) and ethanol (AR, 99.7%) were purchased from Sinopharm Group Chemical Reagent Co., Ltd. All chemicals were used without further purification.

### **1.2 Preparation of ZIF-EC1**

Typically, 1 mL of 0.24 M Zn(OAc)<sub>2</sub>·2H<sub>2</sub>O aqueous solution was added in 2 mL of 1.92 M 2-methylimidazole aqueous solution. The mixture was kept vigorously stirring for 4 h. White powder was obtained by centrifugation at 10000 rpm for 3 min and washed with deionized water 3-5 times and dried at 60 °C for 24 h.

### **1.3 Preparation of ZIF-EC1(ZnCo)-X**

Typically, 1 mL of aqueous solution contained 0.24 M Zn(OAc)<sub>2</sub>·2H<sub>2</sub>O and X M Co(OAc)<sub>2</sub>·4H<sub>2</sub>O for different percentages (0.036 M for 15%, 0.048 M for 20% and 0.06 M for 25%) was added in 2 mL of 1.92 M 2-methylimidazole aqueous solution. The mixture was kept vigorously stirring for 4 h. The obtained powder was collected by centrifugation at 10000 rpm and washed with deionized water for 3-5 times and dried at 60 °C for 24 h.

### **1.4 Preparation of ZIF-EC1-900 and ZIF-EC1(ZnCo)-900**

50 mg precursor (ZIF-EC1 and ZIF-EC1-X%Co) was pyrolyzed in a tube furnace at 900 °C for 2 h with a heating speed and cooling speed of 5 °C/min to obtain ZIF-EC1-900 and ZIF-EC1(ZnCo)-X-900.

### **1.5 Preparation of ZIF-L(Zn) and ZIF-L(Zn)-900**

Typically, 2 mmol of Zn(NO)<sub>3</sub>·6H<sub>2</sub>O was dissolved in 40 mL deionized water, stirred for 10 min to obtain solution A. 16 mmol of 2-methylimidazole was dissolved in 40 mL deionized water, stirred for 10 min to obtain solution B. Then, solution A was poured into solution B under stirring condition and the mixture was kept stirring for 4 h to obtain a white suspension. The white powder (denoted by ZIF-L(Zn)) was obtained by centrifuging at 10000 rpm for 3 min and drying at 60 °C for 12 h. Synthesis of ZIF-L(Zn)-900: 50 mg of ZIF-L(Zn) powder was transferred to a quartz boat and pyrolyzed at 900 °C with a heating speed and cooling speed of 5 °C/min under Ar flow.

### **1.6 Characterization**

The morphology of the materials was characterized with a scanning electron microscopy (SEM, Hitachi SU8020) at an accelerating voltage of 3 kV and a

transmission electron microscope (TEM, JEOL JEM-2100) with a field emission gun operating at 200 kV. EDS analysis was conducted on an AMETEK Materials Analysis EDX equipped on the TEM. Powder X-ray diffraction (PXRD) patterns of materials were tested on an X-ray diffractometer (Bruker, D8 Advance, Cu  $K\alpha$ ,  $\lambda = 1.5406 \text{ \AA}$ , 40 kV/40 mA). 3DED data were collected with a Timepix pixel detector QTPX-262k (512 x 512 pixels, Amsterdam Sci. Ins.) on a JEOL JEM2100 microscope at 200 kV. Brunauer-Emmett-Teller (BET) specific surface area was measured in Micromeritics ASAP 2020.

### 1.7 Electrochemical measurement

All ORR electrochemical tests were carried out on a CHI 660E (CH Instruments) electrochemical workstation and a Pine Modulated Speed Rotator (Pine Research Instrumentation, Inc.) at 30 °C. A three-electrode system was used to conduct ORR tests. The counter electrode is a graphite rod, and the reference electrode is a saturated Ag/AgCl electrode. The working electrode is a rotating disk electrode (RDE) (5 mm, 0.196 cm<sup>2</sup>). The catalyst ink consists of 2 mg catalyst, 10  $\mu\text{L}$  of Nafion solution (5 wt%, DuPont), 100  $\mu\text{L}$  of deionized water, and 400  $\mu\text{L}$  of isopropanol. The mixture was ultrasonicated for about 1 h to prepare a homogeneous catalyst ink. Then, 20  $\mu\text{L}$  catalyst ink was evenly dropped on the RDE, the catalyst load is 0.08 mg. The cyclic voltammetry (CV) curves were tested in O<sub>2</sub>/Ar-saturated 0.1 M KOH solution at the scan rate of 50 mV s<sup>-1</sup>. The linear sweep voltammetry (LSV) tests were carried out in O<sub>2</sub>-saturated 0.1 M KOH solution at a rotational speed range of 400 to 1600 rpm at the scan rate of 5 mV·s<sup>-1</sup> after 100% IR compensation.

The potentials corresponding to the reversible hydrogen electrode (RHE) electrode were calculated with the following equation:

$$E_{RHE} = E_{Ag/AgCl} + (0.197 + 0.0591 \times pH)$$

The number of electron transfers (n) is calculated by the Koutecky-Levich (K-L) formula:

$$\frac{1}{j} = \frac{1}{j_l} + \frac{1}{j_k} = \frac{1}{B\omega^{1/2}} + \frac{1}{j_k}$$

$j$  is the measured current density;  $j_l$  is the diffusion current density;  $j_k$  is the dynamic current density;  $\omega$  is the rotational speed (rpm); B can be confirmed by the Koutecky-Levich (K-L) formula:

$$B = 0.2nFC_0(D_0)^{2/3}\nu^{-1/6}$$

Where  $F$  is the Faraday constant ( $96485 \text{ C mol}^{-1}$ );  $C_0$  is the concentration of  $\text{O}_2$  in  $0.1 \text{ M KOH}$  ( $1.2 \times 10^{-6} \text{ mol cm}^{-3}$ );  $D_0$  is the diffusion coefficient of  $\text{O}_2$  in  $0.1 \text{ M KOH}$  ( $1.9 \times 10^{-5} \text{ cm}^2 \text{ s}^{-1}$ );  $\nu$  is the viscosity of  $0.1 \text{ M KOH}$  ( $0.1 \text{ cm}^2 \text{ s}^{-1}$ ).

**Table S1.** Electrochemical ORR activities of Co-based electrocatalysts in this work and other reported works.

| Catalyst                                   | Electrolyte     | $E_{1/2}$ vs RHE | Ref.                                                                             |
|--------------------------------------------|-----------------|------------------|----------------------------------------------------------------------------------|
| <b>ZIF-EC1(ZnCo)-20-900</b>                | <b>0.1M KOH</b> | <b>876 mV</b>    | <b>This work</b>                                                                 |
| Co@DMOF-900                                | 0.1M KOH        | 866 mV           | <i>Angew. Chem. Int. Ed.</i> 2021, <b>60</b> , 21685-21690 <sup>1</sup>          |
| Co(PO <sub>3</sub> ) <sub>2</sub> /NC      | 0.1M KOH        | 780 mV           | <i>J. Catal.</i> 2020, <b>387</b> , 129-137 <sup>2</sup>                         |
| Co-TpBpy-800 nanocages                     | 0.1M KOH        | 830 mV           | <i>Chem. Eng. J.</i> , 2020, <b>401</b> , 126149 <sup>3</sup>                    |
| Co-PTS-COPs@MWCNTs                         | 0.1M KOH        | 835 mV           | <i>J. Mater. Chem. A</i> , 2022, <b>10</b> , 5918-5924 <sup>4</sup>              |
| Co SA/N-CNS-900                            | 0.1M KOH        | 872 mV           | <i>J. Energy Chem.</i> , 2022, <b>68</b> , 184-194 <sup>5</sup>                  |
| Co/Co <sub>3</sub> O <sub>4</sub> @CoS-SNC | 0.1M KOH        | 860 mV           | <i>Chem. Eng. J.</i> , 2021, <b>419</b> , 129619 <sup>6</sup>                    |
| Co-N-C/CNF                                 | 0.1M KOH        | 859 mV           | <i>Nano Res.</i> , 2022, <b>16</b> , 545-554 <sup>7</sup>                        |
| HEO/CoNC-3-1                               | 0.1M KOH        | 850 mV           | <i>Appl. Surf. Sci.</i> , 2023, <b>610</b> , 155624 <sup>8</sup>                 |
| C-Co(OH) <sub>2</sub> @ZIF-8-10%-1000      | 0.1M KOH        | 840 mV           | <i>J. Alloy. Compd.</i> , 2022, <b>912</b> , 165198 <sup>9</sup>                 |
| MPF/Co <sub>5</sub> wt. %                  | 0.1M KOH        | 800 mV           | <i>Chem. Eng. J.</i> , 2023, <b>458</b> , 141468 <sup>10</sup>                   |
| Co/N/C-1000                                | 0.1M KOH        | 860 mV           | <i>ACS Appl. Mater. Interfaces</i> , 2019, <b>11</b> , 41258-41266 <sup>11</sup> |

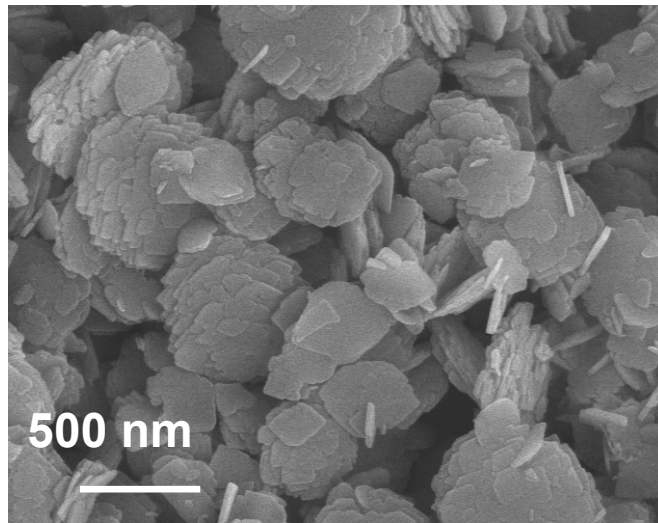

**Fig. S1.** SEM image of ZIF-EC1.

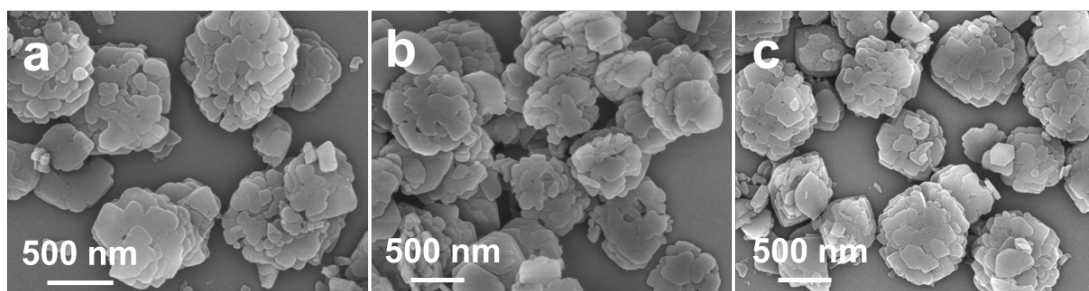

**Fig. S2.** SEM images of ZIF-EC1(ZnCo)-15 (a), ZIF-EC1(ZnCo)-20 (b), and ZIF-EC1(ZnCo)-25 (c).

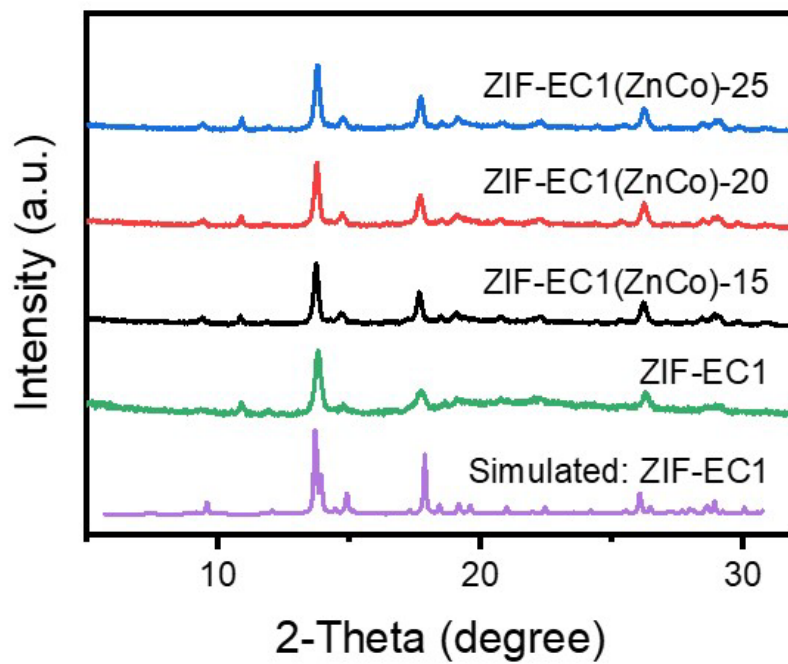

**Fig. S3.** PXRD patterns of ZIF-EC1, ZIF-EC1(ZnCo)-15, ZIF-EC1(ZnCo)-20, and ZIF-EC1(ZnCo)-25.



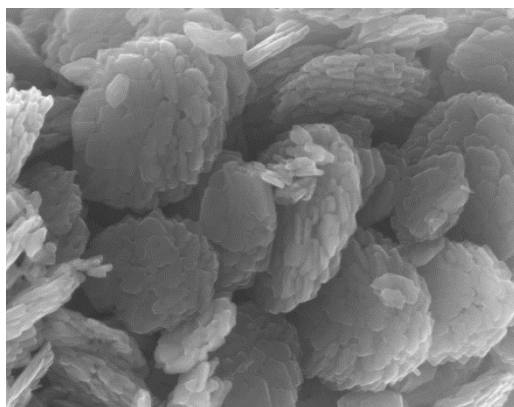

**Fig. S4.** SEM image of ZIF-EC1-900.

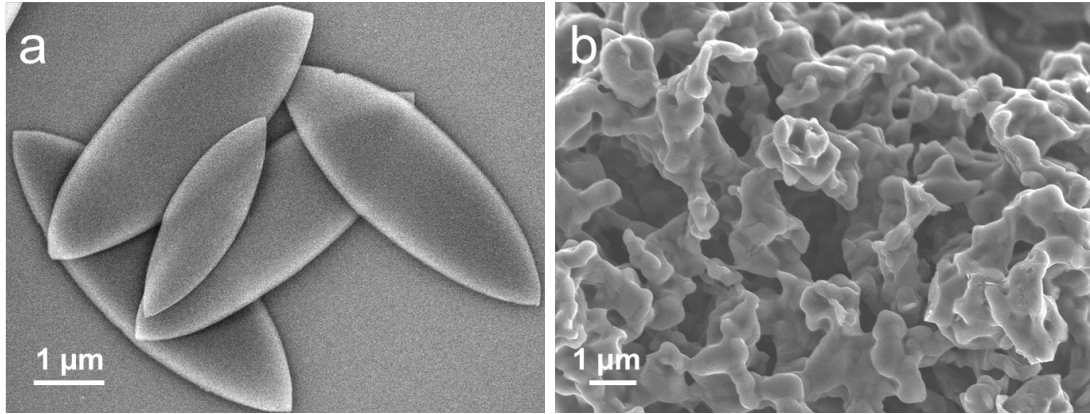

**Fig. S5.** SEM images of ZIF-L(Zn) (a) and ZIF-L(Zn) pyrolyzed in Ar at 900 °C (b).

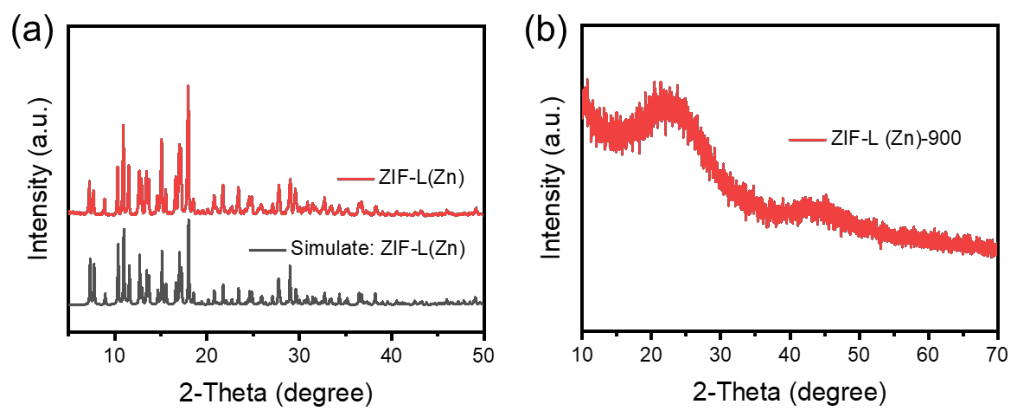

**Fig. S6.** (a) XRD patterns of ZIF-L(Zn) and simulated ZIF-L(Zn). (b) The XRD pattern of ZIF-L(Zn)-900.

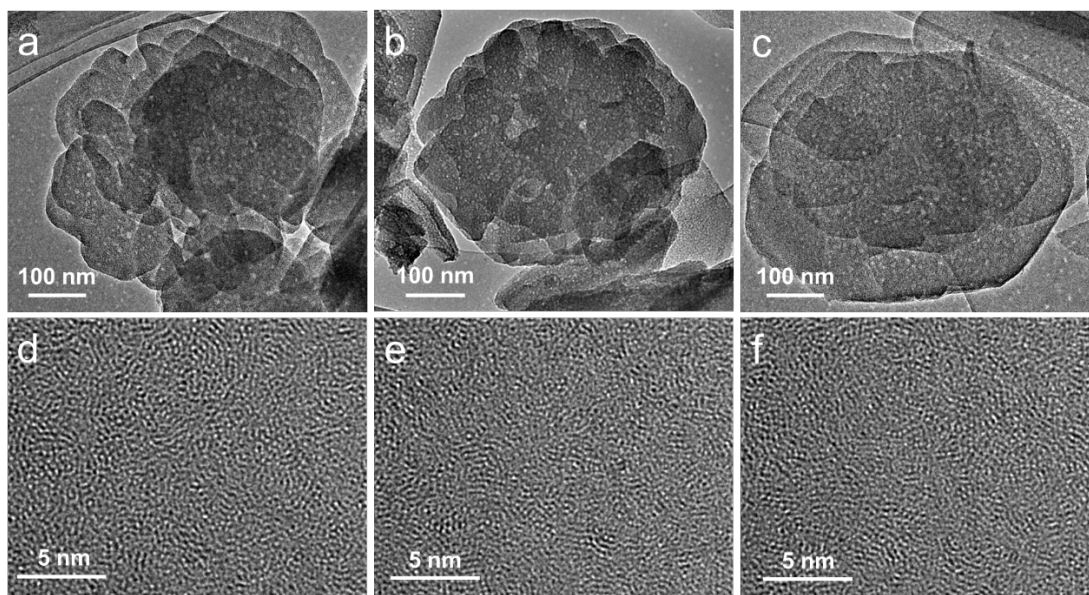

**Fig. S7.** TEM images of ZIF-EC1(ZnCo)-15-900 (a), ZIF-EC1(ZnCo)-20-900 (b), and ZIF-EC1(ZnCo)-25-900 (c). High-resolution TEM images of ZIF-EC1(ZnCo)-15-900 (a), ZIF-EC1(ZnCo)-20-900 (b), and ZIF-EC1(ZnCo)-25-900(c).

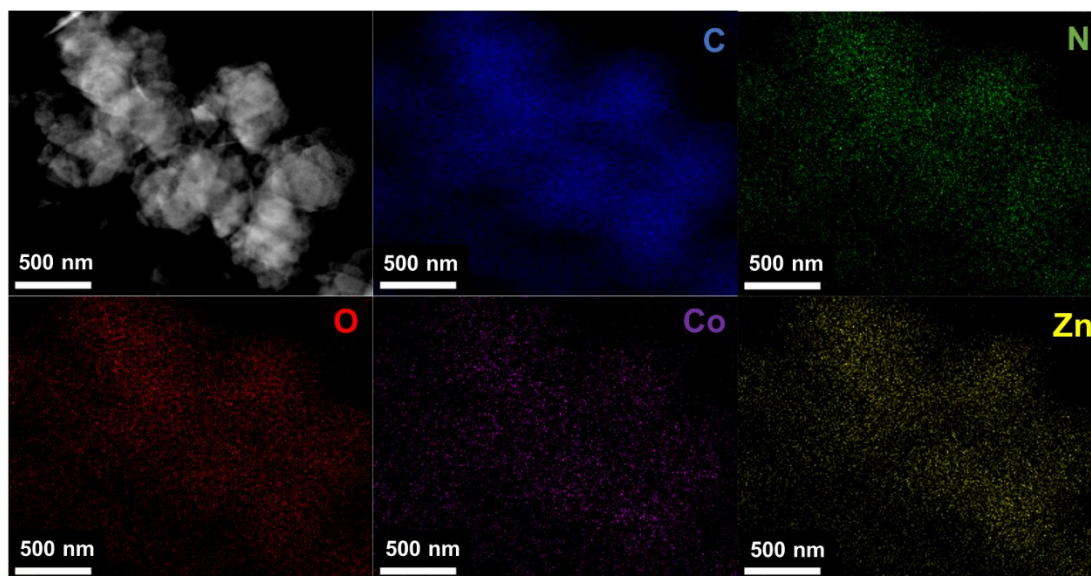

**Fig. S8.** HAADF-STEM image and corresponding element mapping images of ZIF-EC1(ZnCo)-20-900.

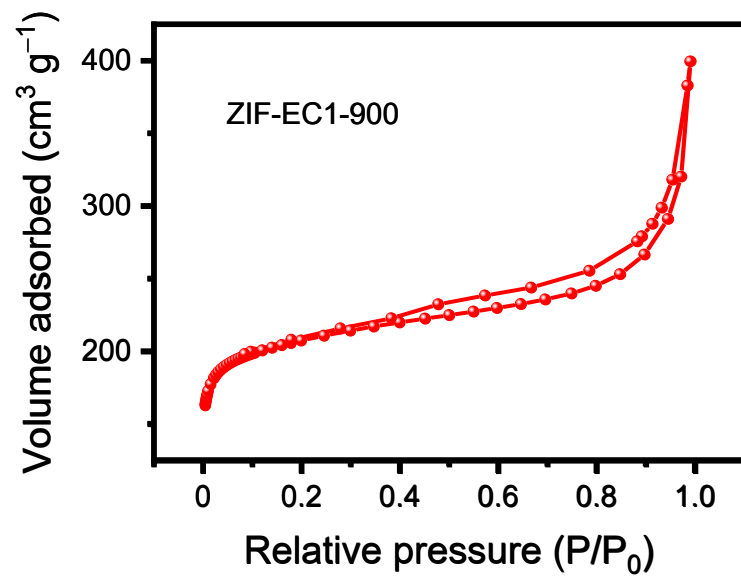

**Fig. S9.** N<sub>2</sub> adsorption-desorption isotherm of ZIF-EC1(ZnCo)-20-900, from which the Brunauer-Emmett-Teller (BET) surface areas are estimated as 802 m<sup>2</sup> g<sup>-1</sup>.

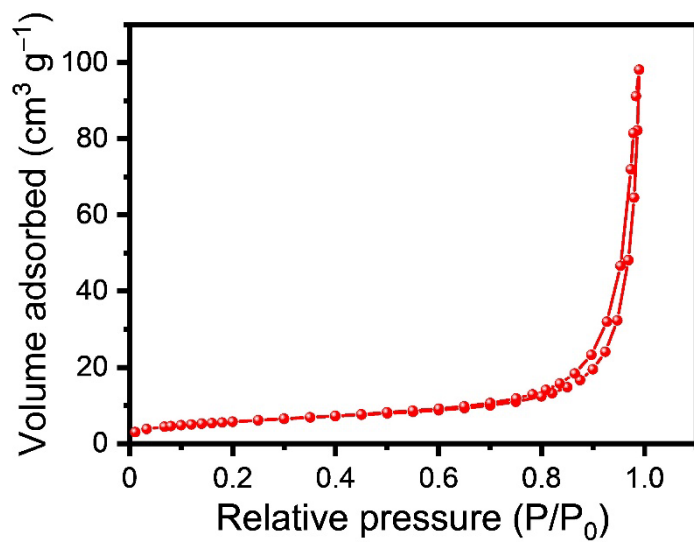

**Fig. S10.** N<sub>2</sub> adsorption-desorption isotherm of ZIF-EC1(ZnCo)-20, from which the Brunauer-Emmett-Teller (BET) surface areas are estimated as 20.3 m<sup>2</sup> g<sup>-1</sup>.

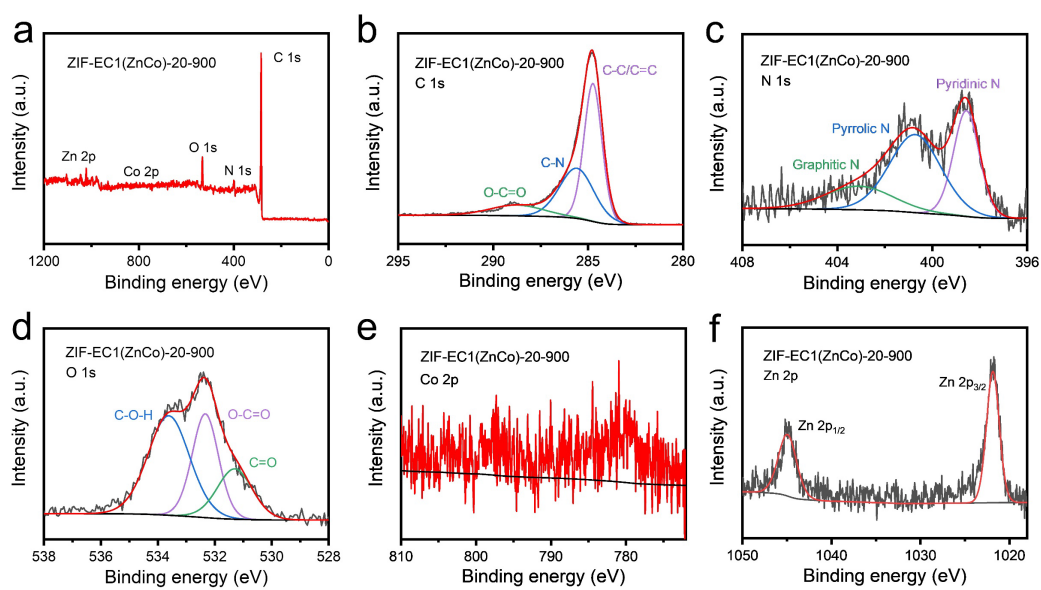

**Fig. S11.** (a) XPS survey spectra of ZIF-EC1(ZnCo)-20-900. High-resolution XPS spectra of C 1s (b), N 1s (c), O 1s (d), Co 2p (e) and Zn 2p (f) for ZIF-EC1(ZnCo)-20-900.



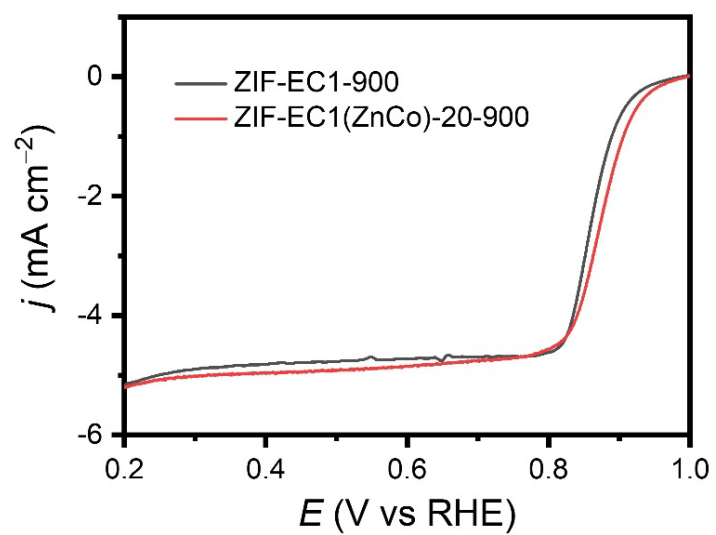

**Fig. S12.** LSV curves of ZIF-EC1-900 and ZIF-EC1(ZnCo)-20-900.

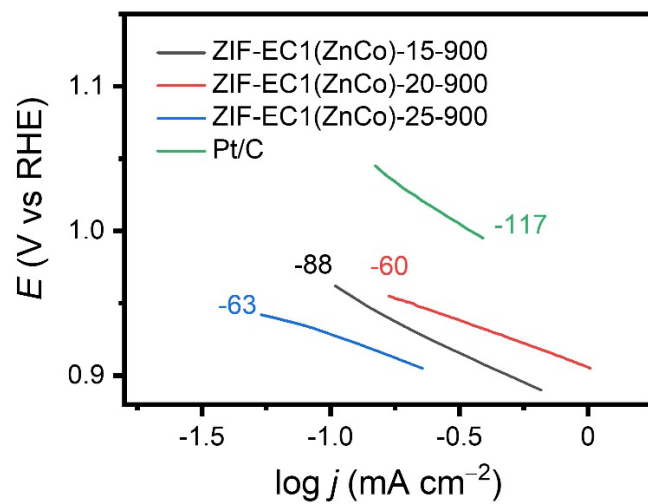

**Fig. S13.** Tafel slopes derived from Fig. 4b.

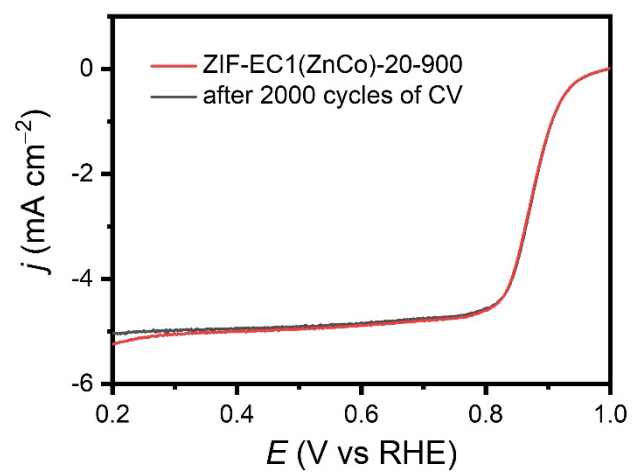

**Fig. S14.** LSV curve of ZIF-EC1(ZnCo)-20-900 and LSV curve after 2000 cycles of CV.

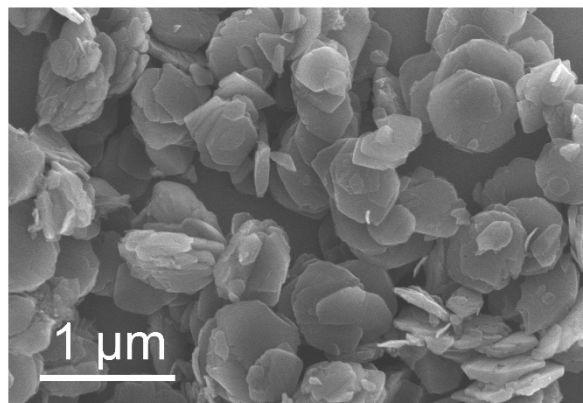

**Fig. S15.** SEM image of ZIF-EC1(ZnCo)-20-900 after 2000 cycles of CV.

## References:

- 1 S. Yuan, J. Zhang, L. Hu, J. Li, S. Li, Y. Gao, Q. Zhang, L. Gu, W. Yang, X. Feng and B. Wang, *Angew. Chem. Int. Ed.*, 2021, **60**, 21685-21690.
- 2 L.-H. Xu, S.-L. Zhang, S.-Y. Guo, X.-J. Zhang, S. Cosnier, R.S. Marks, W.-J. Wang, H.-B. Zeng and D. Shan, *J. Catal.*, 2020, **387**, 129-137.
- 3 H. Chen, Q.-H. Li, W. Yan, Z.-G. Gu and J. Zhang, *Chem. Eng. J.*, 2020, **401**, 126149.
- 4 R. Ma, X. Cui, Y. Wang, Z. Xiao, R. Luo, L. Gao, Z. Wei and Y. Yang, *J. Mater. Chem. A*, 2022, **10**, 5918-5924.
- 5 T. Shen, X. Huang, S. Xi, W. Li, S. Sun and Y. Hou, *J. Energy Chem.*, 2022, **68**, 184-194.
- 6 H. Pan, X. Huang, Z. Lu, Z. Zhang, B. An, D. Wu, T. Wang, X. Chen and F. Cheng, *Chem. Eng. J.*, 2021, **419**, 129619.
- 7 B. Zhang, Y. Zhao, L. Li, Y. Li, J. Zhang, G. Shao and P. Zhang, *Nano Res.*, 2022, **16**, 545-554.
- 8 T. Yu, H. Xu, Z. Jin, Y. Zhang and H.-J. Qiu, *Appl. Surf. Sci.*, 2023, **610**, 155624.
- 9 J.-M. Yang, K.-A. Wang and H.-B. Zhu, *J. Alloy. Compd.*, 2022, **912**, 165198.
- 10 S. Akula, M. Mooste, J. Kozlova, M. Käärrik, A. Treshchalov, A. Kikas, V. Kisand, J. Aruväli, P. Paiste, A. Tamm, J. Leis and K. Tammeveski, *Chem. Eng. J.*, 2023, **458**, 141468.
- 11 W. Sun, L. Du, Q. Tan, J. Zhou, Y. Hu, C. Du, Y. Gao and G. Yin, *ACS Appl. Mater. Interfaces*, 2019, **11**, 41258-41266.
